# Supplementary material for: The Effect of pH on the Viscoelastic Response of Alginate–Montmorillonite Nanocomposite Hydrogels
Source: MDPI journal article supplement (doi:10.3390/molecules29010244), 2024-01-02
Supplement: s1 [file s1]

# Supplementary material

## The Effect of pH on the Viscoelastic Response of Alginate-Montmorillonite Nanocomposite Hydrogels

Haniyeh Malektaj <sup>1,\*</sup>, Aleksey D Drozdov <sup>1</sup>, Elham Fini <sup>2</sup> and Jesper de Claville Christiansen <sup>1</sup>

<sup>1</sup> Department of Materials and Production, Aalborg University, Fibigerstraede 16, 9220 Aalborg, Denmark

<sup>2</sup> School of Sustainable Engineering and Built Environment, Arizona State University, 660 S College Ave, Tempe, AZ 85281, USA

\* Correspondence: haniyehm@mp.aau.dk

To assess the characteristic time for equilibration of samples before mechanical tests, swelling tests were performed on as-prepared hydrogels immersed into aqueous solution with pH = 7. Experimental data are depicted in Figure S1, where the degree of swelling  $Q$  is plotted versus the immersion time  $t$ . This figure shows that 2 days of immersion into water is sufficient to reach the equilibrium.

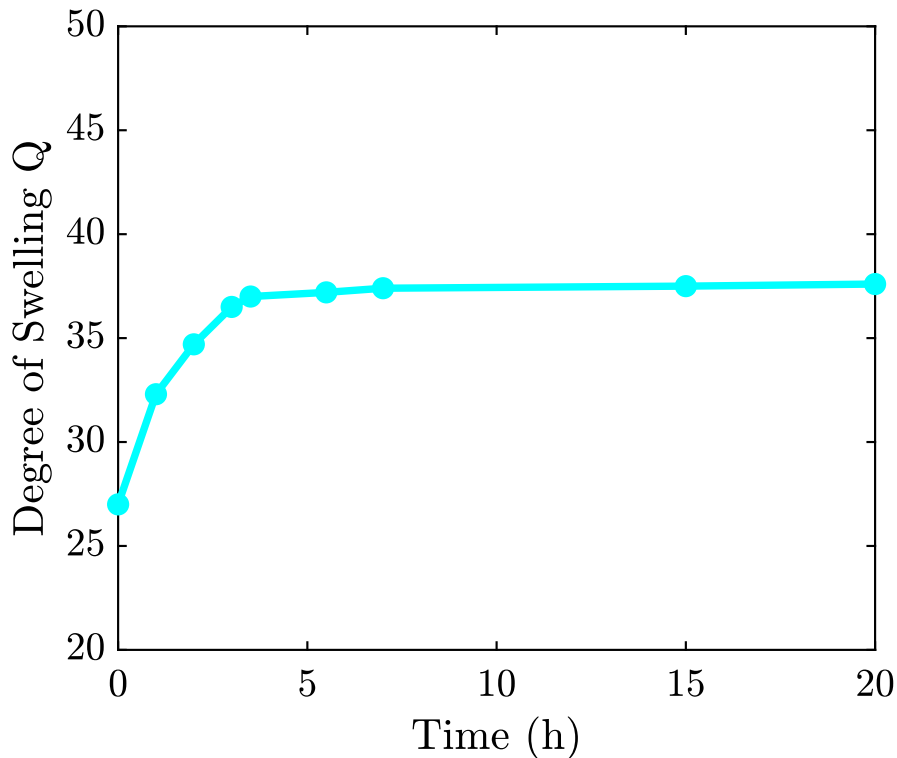

**Figure S1.** Degree of swelling  $Q$  versus time  $t$  for alginate hydrogels in aqueous solutions with pH = 7.
